# Supplementary material
Source: Springer Nature journal article supplement (https://www.springermedizin.de/resource/supplementary/12916_2011_395_MOESM1_ESM.pdf/9599852)
Supplement: MOESM1 [file 9599852]

Screen identifies new candidate marker

Search web for antibody

Apply antibody to TMAs

Report/publish findings

**Technical validation of the assay:**

- Is the primary antibody suitable for formalin fixed paraffin embedded samples?
- Has the immunohistochemical assay been optimised adequately?
- Are optimal positive and negative controls available?
- What is the 'gold standard' to calibrate the test?
- Is the test robust and fit for purpose?
- Do pre-analytical parameters have an impact on the accuracy of the test?
- Are TMAs fit for purpose?

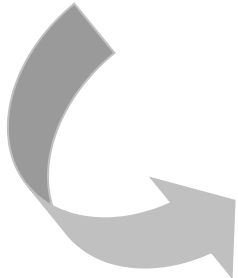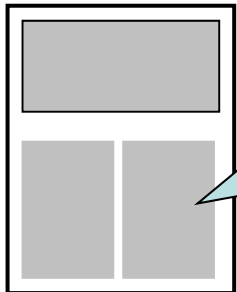

The new marker for breast cancer shows....
